# Supplementary material
Source: publisher site journal article supplement (https://www.dovepress.com/article/318007)
Supplement: Supplementary file 1 [file get_supplementary_file.php]

**Supplementary Table 1**. Details of treatment received after progression in afatinib per patient.

| **Patient** | **Drug A** | **Drug B** | **Drug C** | **Drug D** | ***EGFR mutation*** |
| --- | --- | --- | --- | --- | --- |
| 1 | Atezolizumab |  |  |  | deletion 19 |
| 2 | Osimertinib |  |  |  | deletion 19 |
| 3 | Carboplatin | Gemcitabine |  |  | deletion 19 |
| 4 | Gefitinib | Denosumab |  |  | deletion 19 |
| 5 | Osimertinib |  |  |  | deletion 19 |
| 6 | Osimertinib |  |  |  | L858R |
| 7 | Osimertinib |  |  |  | deletion 19 |
| 8 | Osimertinib |  |  |  | deletion 19 |
| 9 | Afatinib |  |  |  | R776S+L858R |
| 10 | Osimertinib |  |  |  | deletion 19 |
| 11 | Nivolumab |  |  |  | deletion 19 |
| 12 | Osimertinib |  |  |  | deletion 19 |
| 13 | Osimertinib |  |  |  | L858R |
| 14 | Osimertinib |  |  |  | deletion 19+T790M |
| 15 | Nivolumab |  |  |  | deletion 19 |
| 16 | Osimertinib |  |  |  | L858R+T790M |
| 17 | Osimertinib |  |  |  | deletion 19+T790M |
| 18 | Pemetrexed | Carboplatin |  |  | deletion 19 |
| 19 | Osimertinib |  |  |  | L858R |
| 20 | Pemetrexed | Carboplatin |  |  | G719X+L861Q |
| 21 | Osimertinib |  |  |  | L858R+T790M |
| 22 | Cisplatin |  |  |  | deletion 19 |
| 23 | Carboplatin | Pembrolizumab |  |  | deletion 19 |
| 24 | Carboplatin | Pembrolizumab |  |  | deletion 19 |
| 25 | Carboplatin | Pembrolizumab |  |  | deletion 19 |
| 26 | Carboplatin | Pembrolizumab |  |  | deletion 19 |
| 27 | Osimertinib |  |  |  | deletion 19 |
| 28 | Carboplatin | Pembrolizumab | Bevacizumab |  | L858R |
| 29 | Paclitaxel | Carboplatin | Bevacizumab | Atezolizumab | deletion 19 |
| 30 | Carboplatin | Pembrolizumab |  |  | deletion 19 |
| 31 | Osimertinib |  |  |  | deletion 19 |
| 32 | Osimertinib |  |  |  | deletion 19 |
| 33 | Carboplatin | Pembrolizumab |  |  | deletion 19 |
| 34 | Carboplatin | Pembrolizumab | Bevacizumab |  | L858R |
| 35 | Vinorelbine |  |  |  | deletion 19 |
| 36 | Osimertinib |  |  |  | deletion 19 |
| 37 | Carboplatin | Pembrolizumab | Bevacizumab |  | deletion 19 |
